# Supplementary material
Source: HighWire-hosted journal article supplement (https://bmjopenquality.bmj.com/highwire/filestream/135914/field_highwire_adjunct_files/0/Baseline_measurement.docx)
Supplement: Baseline_measurement.docx [file Baseline_measurement.docx]

**Figure 1 : An example of a typical handwritten TTO discharge medication prescription given to patient’s at time of discharge.**

**
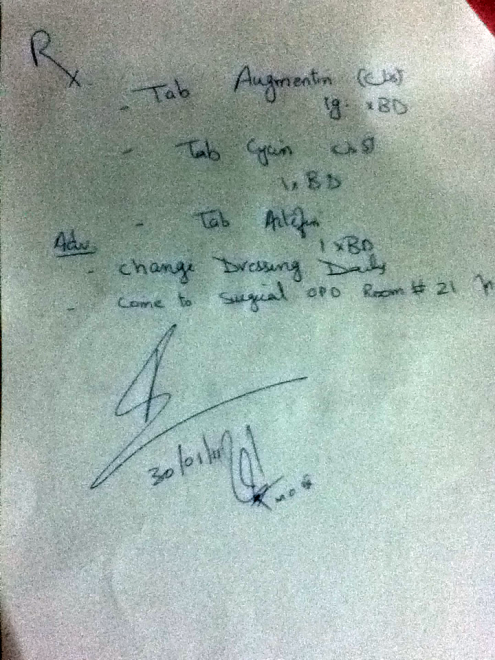
**

**Table 1 : Percentage of patients who could understand their TTO discharge prescription at time of discharge. N = number of patients in each subgroup (100 patients in total)**

| Patient Subgroup | Adherence | |
| --- | --- | --- |
| N | % |
| Literate, and received counselling | 24 | 100 |
| Literate, but not counselled | 28 | 93 |
| Illiterate, and received counselling | 26 | 12 |
| Illiterate, but not counselled | 22 | 5 |
|  | | |
| Total patient population, and received counselling | * | 58 |
| Total patient population, and not received counselling | * | 51 |

**Bar chart 1 :**
